# Supplementary material for: What Do Acute Kidney Injury Survivors Want to Know About Their Condition: A Qualitative Study
Source: PubMed Central journal article supplement — Kidney Med. 2022 Feb 1;4(4):100423. doi: 10.1016/j.xkme.2022.100423 (PMC9044096; doi:10.1016/j.xkme.2022.100423), 2022-02-01
Supplement: mmc1.pdf [file mmc1.pdf]

Item S1

## Interview Questions

Time Stamp: \_\_\_\_\_

**1. Did anyone in the hospital tell you that you had acute kidney injury, or A K I for short?**

*(DON'T READ RESPONSES – CODE ACCORDINGLY BASED ON RESPONSE)*

- Yes
- Other – Told they had a kidney problem
- No (SKIP TO #Q3)
- Don't remember (SKIP TO #Q3)

**2. Who first told you about your acute kidney injury (or kidney problem)?**

*(DON'T READ RESPONSES – CODE ACCORDINGLY BASED ON RESPONSE)*

- The main doctors taking care of me in the hospital
- The kidney doctors in the hospital (also called nephrologists)
- Other \_\_\_\_\_
- I don't know

Time Stamp: \_\_\_\_\_

**3. What were you told about your kidneys, if anything?**

---

---

Time Stamp: \_\_\_\_\_

**4. When you hear the term, acute kidney injury or A comes to mind?**

---

---

---

**Thank you for providing that information. Just so that we are “on the same page” as we move forward with the interview, I would like to give you the medical definition of acute kidney injury.**

*“Acute kidney injury, or A K I for short, means that your kidneys have suddenly become weaker than they were before you were in the hospital. Acute kidney injury is usually caused by being sick or taking certain medicines.”*

**Now, let’s talk about your acute kidney injury experience in the hospital. Take a moment and think back to your hospital stay.**

**Remember, there are NO RIGHT OR WRONG ANSWERS to these questions; we are just interested in hearing about your experience with acute kidney injury.**

**Time Stamp:**\_\_\_\_\_

**5. What were you told about your kidneys during your time in the hospital?**

**PROBE:** What did the provider say? How did they describe or explain it?

---

---

---

**Time Stamp:** \_\_\_\_\_

**6. What were you told about having more kidney problems after acute kidney injury?**

---

---

---

*If other health problems were more significant during their hospital stay, ask participant to try to focus on their kidneys. Or, what could have been done after the more significant health problems were better.*

**Time Stamp:** \_\_\_\_\_

**7. What questions did you ask about your kidneys? And, how were your questions answered?**

---

---

---

**Time Stamp:** \_\_\_\_\_

**8. How did you feel when you were told?**

*PROBE: What concerns or worries did you have?*

---

---

---

**Time Stamp:** \_\_\_\_\_

**9. What did the health care providers tell you about caring for your kidneys after acute kidney injury? What were you told to do, if anything, once you left the hospital?**

---

---

---

**Time Stamp:** \_\_\_\_\_

**10. Were you told to follow up with your family doctor or a kidney doctor once you were home from the hospital? (DON'T READ RESPONSES – CODE ACCORDINGLY BASED ON RESPONSE)**

- Yes
- No
- Don't remember

Now, I am going to ask you to think about after you left the hospital.

**11. Did you think about your kidneys or things you needed to do to care for your kidneys after you left the hospital? (DON'T READ RESPONSES – CODE ACCORDINGLY BASED ON RESPONSE)**

- Yes
- No
- Don't remember

**Time Stamp:** \_\_\_\_\_

**12. What things did you think you needed to do to care for your kidneys, if anything, after acute kidney injury? What specific behaviors, if any, did you think you needed to do?**

---

---

---

**Time Stamp:** \_\_\_\_\_

**13. What did you do differently, if anything, after you left the hospital because of your acute kidney injury?**

---

---

---

*Information related to the following questions may have already been provided by the participant in his/her response to Q#13. If so, restate to confirm rather than asking the question(s) below.*

**Time Stamp:**\_\_\_\_\_

**14. Have you seen your regular doctor or primary care provider since you left the hospital? (DON'T READ RESPONSES – CODE ACCORDINGLY BASED ON RESPONSE)**

- Yes
- No (SKIP TO Q#16)
- Don't remember (SKIP TO Q#16)

**15. Have you and your regular doctor or primary care provider talked about acute kidney injury since you left the hospital? (DON'T READ RESPONSES – CODE ACCORDINGLY BASED ON RESPONSE)**

- Yes
- No
- Don't remember

**Time Stamp:**\_\_\_\_\_

**16. Have you seen a kidney doctor since you left the hospital (kidney doctors are also called nephrologists)? (DON'T READ RESPONSES – CODE ACCORDINGLY BASED ON RESPONSE)**

- Yes
- No (SKIP TO Q#18 or Q#19)
- Don't remember (SKIP TO Q#18 or Q#19))

**17. Have you and your kidney doctor talked about acute kidney injury since you left the hospital? (DON'T READ RESPONSES – CODE ACCORDINGLY BASED ON RESPONSE)**

- Yes
- No
- Don't remember

**Time Stamp:** \_\_\_\_\_

**18. ONLY ASK IF PARTICIPANT SAW A FAMILY DOCTOR OR NEPHROLOGIST ABOUT THEIR KIDNEYS:**

**18a. What did your [family doctor, kidney doctor] tell you that you found especially helpful when you saw him or her after you got home?**

---

---

---

**18b. What questions did you ask your [family doctor, kidney doctor] when you saw him or her after you got home?**

---

---

---

Now, I am going to ask you to think about your entire, full experience with acute kidney injury.

Time Stamp: \_\_\_\_\_

19. As someone who had acute kidney injury, what do you think would be helpful for patients to know about acute kidney injury?

**PROBES:** What do you wish you would have been told? Try to think of specific pieces of information you want to know or have found helpful once you have been told.

Imagine if you observed your time and treatment in the hospital as an outsider. What would you tell the care team they should do or say to patients about acute kidney injury?

---

---

---

Time Stamp: \_\_\_\_\_

20. Which of these things do you think is the most important thing for patients with acute kidney injury to know?

---

---

---



**Okay, now we are going to finish up with just a few more questions.**

**There is information available about things you can do to help take care of your kidneys after acute kidney injury. We are going to mail you a handout with this information when we are done.**

**Time Stamp:** \_\_\_\_\_

**21. What is the best way for you to learn information about your kidneys? For example, do you like watching a video, reading a brochure or handout, having someone explain it to you, or something else?**

---

---

---

**Time Stamp:** \_\_\_\_\_

**22. When is the best time to get this information? For example, before you are sent home from the hospital, once you are home, some other time?**

---

---

---

**Time Stamp:** \_\_\_\_\_

**23. Who should give you this information? For example, the doctors in the hospital, the nurses in the hospital, your regular or primary care doctor, someone else? Why?**

---

---

**PART 3: Conclusion**

Thank you so very much for your time. We are just about done with our time together.

Before talking today, you may have thought of some topics or questions that you thought we would discuss.

**Time Stamp:** \_\_\_\_\_

**24. What questions did you expect me to ask today that I didn't?**

---

---

---

Thank you. Just a few last questions about you. I will stop the recording now before we move on to the next questions.

**25. What is your gender?**

- Male**
- Female**

**26. What is your age?**

- Between 18 and 44 years old**

- **Between 45 and 64 years old**
- **65 years old and above**

**27. Which of the best describes your race and ethnicity?**

- White, not of Hispanic origin**
- Black, not of Hispanic origin**
- Hispanic or Latino origin**
- Asian**
- American Indian or Alaska Native**
- Other** \_\_\_\_\_

**28. What is the highest grade or year of school you have completed?**

- **Elementary (1-5)**
- **Intermediate or Middle School (6-8)**
- **High School (9-12) or GED**
- **Some College but did not graduate**
- **College**
- **Graduate or Professional School**
